# Supplementary material for: Adaptive laboratory evolution and independent component analysis disentangle complex vancomycin adaptation trajectories
Source: PubMed Central journal article supplement — Proc Natl Acad Sci U S A. 2022 Jul 19;119(30):e2118262119. doi: 10.1073/pnas.2118262119 (PMC9335240; doi:10.1073/pnas.2118262119), 2022-07-19
Supplement: pnas.2118262119.sapp.pdf [file pnas.2118262119.sapp.pdf]

1

2 **Supplementary information (SI) for:**

3

4 Adaptive laboratory evolution and independent component analysis  
5 disentangle complex vancomycin adaptation trajectories

6

7 <sup>1</sup>Anaëlle Fait\*, <sup>2,3</sup>Yara Seif\*, <sup>1</sup>Kasper Mikkelsen, <sup>2</sup>Saugat Poudel, <sup>4</sup>Jerry M. Wells, <sup>2</sup>Bernhard O.  
8 Palsson, <sup>1</sup>Hanne Ingmer<sup>†</sup>

9

10 <sup>1</sup> University of Copenhagen, Department of Veterinary and Animal Sciences, Food safety and  
11 zoonosis, Stigbøjlen 4, 1870 Frederiksberg, Denmark

12 <sup>2</sup> Department of Bioengineering, University of California, San Diego, La Jolla, CA, 92093, USA

13 <sup>3</sup> Merck & Co., Inc., South San Francisco, CA 94080, USA

14 <sup>4</sup> Host-Microbe Interactomics, Animal Sciences Group, Wageningen University, De Elst 1,  
15 Wageningen, The Netherlands

16

17 <sup>†</sup>Hanne Ingmer

18 \*A.F. and Y.S. contributed equally to this study

19

20 **Email:** [hi@sund.ku.dk](mailto:hi@sund.ku.dk)

21 **SI Materials and Methods:**

22

23 **Serial transfer experiments.** The MRSA strain JE2, a plasmid-cured derivative of USA300 LAC,  
24 was grown on increasing concentrations of vancomycin in tryptic soy broth medium (TSB) using a  
25 two-step protocol derived from Rodriguez de Evgrafov *et al.* 2015 (1) (**Figure S6**). In the first step,  
26 the bacteria were challenged with increasing concentrations of vancomycin. Overnight cultures  
27 were diluted to  $10^5$ CFU/ml and used to inoculate a microtiter plate containing 0.25 to 0.5µg/ml  
28 increments in vancomycin concentration. After 18h at 37°C in a fixed incubator, the plates were  
29 visually inspected for growth. The highest concentration to which JE2 grew (subMIC) was recorded,  
30 and this culture was used to inoculate fresh TSB media supplemented with vancomycin at the  
31 strains subMIC and allowed to grow overnight in 3mL cultures. This second step was used to  
32 stabilize any adaptive event occurring from the previous challenge. This two-step evolution  
33 procedure is referred to as an Exposure cycle (E). The culture was used to start a new cycle, and  
34 an aliquot was saved in glycerol at -80°C. 10 independent cultures were grown in parallel resulting  
35 in the lineages L1 to L10. This process was repeated for 30 exposure cycles (60 days) and thorough  
36 characterization was conducted every 10 cycles at timepoints E10, E20 and E30. L5\_E20 and  
37 L9\_E20 were re-adapted to vancomycin for 10 cycles resulting in the 2 additional clones L5\_E30bis  
38 and L9\_E30bis. L3\_E20 contaminated a parallel culture during the laboratory evolution resulting in  
39 two E30 strains for the same lineage, L3\_E30 and L3\_E30bis. The cultures were regularly plated  
40 on TSA to visually check for contaminants.

41

42 **Genome Sequencing and Mutation Analysis.** DNA sequencing was performed on the JE2 strain,  
43 and the JE2-derived vancomycin adapted clones. Chromosomal DNA was isolated using the  
44 DNeasy Blood & Tissue Kit (Qiagen) and concentrations were normalized using a Qubit  
45 (Invitrogen). Sequencing libraries were prepared using the Nextera XT DNA sample preparation kit  
46 (Illumina). Paired-end sequencing was performed at Statens Serum Institut in Copenhagen using  
47 the NextSeq 550 system (Illumina). Data analysis was performed in CLC Genomics Workbench  
48 version 8.0. Reads were mapped against the *S. aureus* USA300\_FPR3757 reference genome

49 (Genbank accession no. NC\_07793). The frequency cut-off for variant calling was set at 30% and  
50 all the detected mutations were verified manually to ensure homogeneity of the variants across  
51 reads and avoid false detection due to imperfect mapping. The variants identified during alignment  
52 of JE2 to the *S. aureus* USA300\_FPR3757 reference genome were excluded in the variant call for  
53 vancomycin-adapted clones. Detailed information on variant calling is presented in **Dataset S1**. We  
54 verified that the passaged populations were homogeneous by sequencing the whole population for  
55 L9 at E20 in addition to sequencing the single clone L9\_E20. There were no additional mutations  
56 during sequencing of the L9 population compared to the single clone, suggesting that the  
57 populations are homogeneous (**Table S9**). However, we detected an additional mutation in the  
58 single clone L9\_E20 that was not present in sequencing of the whole population, or in sequencing  
59 of the subsequent isolate L9\_E30, which suggests that the additional mutation in L9\_E20 was  
60 acquired during isolation of the single clone from the population prior to sequencing. The mutation  
61 is a synonymous mutation in the gene *relA*.

62

63 **Construction of plasmids and strains.** All plasmid constructs were cloned in *E. coli* IM08B (2)  
64 then transformed into *S. aureus* strain JE2. For expression of *vraX*, SAUSA300\_RS02980,  
65 SAUSA300\_RS08750, *sceD*, *vraR*, *vraS*, *vraT* and *vraU*, the genes including their predicted  
66 ribosomal binding site were cloned into the Sall and EcoRI sites of pSK9067 behind the IPTG-  
67 inducible P<sub>spac</sub> promoter (3) using primer pairs listed in **Table S10**, concurrently removing the *gfp*  
68 reporter gene. The *vraT* and *walk* mutants were obtained by genetic recombination using the  
69 protocol by Monk and Stinear, 2021 (4). The *vraT* mutations present in clones L7\_E30, L8\_E20  
70 and L10\_E20 were amplified with 700bp flanking sequences. Due to gene essentiality, the entire  
71 sequence of *walk* was amplified with equal-sized flanking regions upstream and downstream of  
72 the mutations present in clones L1\_E20 and L7\_E20. The inserts were cloned into pIMAY-Z  
73 backbone using the SLiCE (Seamless Ligation Cloning Extract) ligation extract. After pIMAY-Z  
74 integration and plasmid excision, putative mutants were screened by sequencing.

75

76

77 **Mutation co-occurrence analysis.** To assess the co-occurrence of mutations across strains, we  
78 built a weighted graph in Networkx in which mutations were represented as nodes and co-  
79 occurrence of two mutations in strains were represented by edges. To inspect the chronology of  
80 mutation emergence, we constructed two separate weighted undirected graphs for each exposure  
81 level. The first graph accounted for mutations arising at E20 across 10 clones (L1 through L10),  
82 while the second graph accounted for mutations arising at E30 across 12 clones (L1 through L10,  
83 L3bis, L5bis and L9bis). Edges were weighted according to the reciprocal of the number of times  
84 two mutations co-occurred in the same strain. The Girvan-Newman method was then used to find  
85 communities in the graph. Communities are defined as a subset of nodes that share a significantly  
86 larger number of connections than with the rest of the network (5). In this specific case, communities  
87 represent sets of mutated loci that have a higher co-occurrence frequency. Thus, communities  
88 capture potential mutational trajectories at E20 and E30. Next, to represent the importance of a  
89 mutated locus within its community we calculated the harmonic centrality of each node. The  
90 harmonic centrality is described as the sum of the reciprocal of the shortest path distances  $d(v, u)$   
91 from all other nodes to node  $u$ .

92

$$93 \quad C(u) = \sum_{v \neq u} \frac{1}{d(v,u)} \quad \text{Eq (1)}$$

94 In other words, a mutated locus is more central when it occurs across a larger number of clones  
95 and co-occurs with a larger number of nodes and is therefore more closely connected to all other  
96 nodes. We proceeded to compute the edge betweenness centrality, which is a measure of the  
97 importance of an edge in a graph. Mathematically, it is described as the fraction of shortest paths  
98  $\sigma(s, t)$  in a graph that include edge  $e$  and is calculated for all edges.

99

$$100 \quad C_B(e) = \sum_{s,t \in V} \frac{\sigma(s,t|e)}{\sigma(s,t)} \quad \text{Eq (2)}$$

101

102 To highlight nodes and edges that significantly skew the distribution of computed centralities, we  
103 iteratively removed nodes and edges and re-computed centrality values for each sub-network. We

104 then ran a normality test for each z-scored distribution and highlighted the nodes/edges for which  
105 the p-value dropped below 0.05.

106

107 **Independent Component Analysis of transcriptomic profile.** RNA-sequencing and ICA pipeline  
108 used to calculate iModulon structure and activities have been in described in full detail in previous  
109 publications (6, 7). Here, normalized transcripts per million (TPM) from 33 new RNA-seq profiles  
110 were calculated concatenated to the previously published 108 profiles (7). The combined dataset  
111 was centered to strain-specific reference conditions. These conditions are labeled  
112 “USA300\_TCH1516\_U01-Set000\_CAMHB\_Control\_1”, “USA300\_TCH1516\_U01-  
113 Set000\_CAMHB\_Control\_2” for TCH1516; and “USA300\_LAC\_U01-Set001\_CAMHB\_Control\_1”,  
114 “USA300\_LAC\_U01-Set001\_CAMHB\_Control\_2” for LAC. The combined centered dataset was  
115 used for ICA decomposition with 100 iterations, and 10e-8 tolerance and 46 components.

116

117 ICA outputs an  $\mathbf{S}_{(\text{genes} \times \text{IC})}$  and an  $\mathbf{A}_{(\text{components} \times \text{samples})}$  matrix, corresponding to structure and activity  
118 of iModulons, respectively. The  $\mathbf{S}_{(\text{genes} \times \text{IC})}$  matrix lists the weights of each gene (rows) in each  
119 extracted component (columns). Most gene weightings in each of the independent components of  
120  $\mathbf{S}$  are normally distributed. However, weightings of genes in an iModulon, representing the signal  
121 for each component fall outside this normal distribution, i.e. the absolute value of their weights are  
122 higher than what would be expected of a normally distributed variable (6). To enrich these genes,  
123 we used Scikit-learn’s implementation of the D’Agostino K2 test, which measures the ‘normality’ of  
124 sample distribution based on skew and kurtosis (8, 9). For each component in  $\mathbf{S}$ , weights were  
125 converted to their absolute value, and genes were sorted by the absolute weightings in that  
126 component. Genes with the highest weighting were then removed iteratively until the D’Agostino  
127 K2 test for the remaining distribution fell below the previously tested cutoff value of 280. The outlier  
128 genes which were removed constitute the gene set of an iModulon.

129

130 The analysis yielded 40 robust independent components (IC, **Dataset S2**). We proceeded to  
131 annotate the 40 iModulons with biological annotations. As a first step we compared each iModulon

132 to assembled and curated annotations containing features such as known regulons, genomic  
133 islands, prophages etc (7). Next, we mapped each iModulon to a regulon by either comparing  
134 iModulon gene sets to differentially expressed genes in transcription factor knockout experiments  
135 or by implementing the RegPrecise algorithm (10–14). The iModulon genes for each component  
136 were compared to this database for significant overlap using Fisher's exact test with FDR of 0.05.  
137 If iModulon genes had any significant overlap with the features in the dataset with precision  $\geq 0.5$   
138 and recall  $\geq 0.2$ , the iModulon was annotated with the feature name e.g. VraR,  $\phi$ Sa3, CcpA etc.  
139  
140

141 **SI Figures:**

142

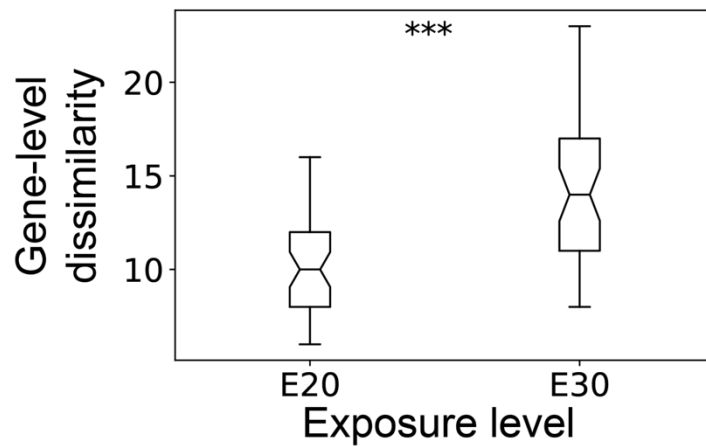

143

144 **Figure S1: Mutational divergence indicated by increasing gene-level mutation dissimilarity**

145 **across exposure levels.** We compared the pairwise dissimilarity in the identity of mutated genes

146 across exposure levels. On average, two clones differ by 9.7 +/-2.7 mutated genes at E20, and by

147 14.2 +/- 3.5 mutated genes at E30. A Student's t-test underscores a significance increase in

148 dissimilarity in mutational profiles across evolutionary time ( $p \ll 0.01$ , statistic = -6.8). N.b., we

149 excluded L3\_E30, L5\_E30 and L9\_E30 profiles from our analysis, for the benefit of correctly

150 accounting for mutations accumulated across L3\_E30bis, L5\_E30bis, and L9\_E30bis, respectively,

151 and to avoid the bias resulting from high similarity between replicate pairs.

152

153

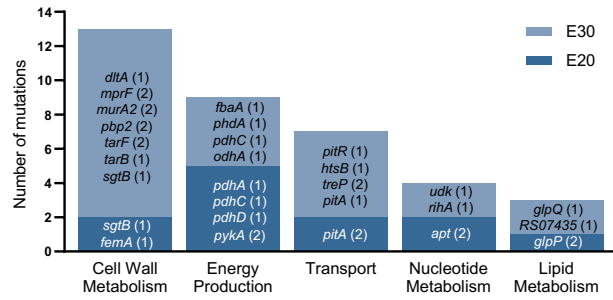

154

155 **Figure S2. Mutations in metabolism COG subsystems at E20 and E30.** The mutated genes in  
 156 each COG subsystem are presented in each graph bar. The number of times the gene was  
 157 mutated across lineages is shown in parentheses.

158

159



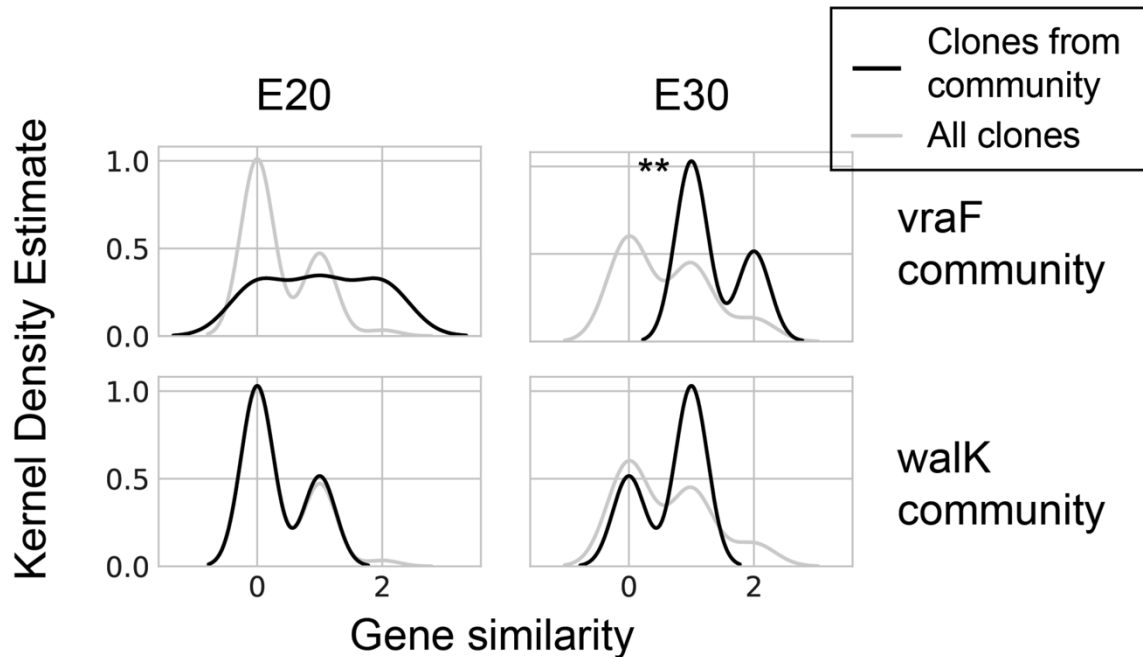

160

161 **Figure S3: Gene level similarity across sub-communities of clones identified through**  
 162 **network analysis of mutational patterns.** We compare the gene level similarity (pairwise  
 163 number of shared mutated genes) across the two sub-communities (in black, *vraF*: L2, L5 and L6,  
 164 and *walk*: L4, L7 and L8) in comparison to the background (in grey, all strains) across exposure  
 165 levels. Interestingly, we notice that while at E20, gene level similarities within the two sub-  
 166 communities are comparable to background, the distribution is right shifted at E30, with a larger  
 167 number of common genes being target by mutations within the respective sub-communities than  
 168 in the background population. On average, two clones of the *walk* sub-community share 1.3  
 169 mutated genes (in contrast to only 0.6 for two random clones), while two clones from the *vraF*  
 170 community share 0.66 mutated genes. We observe statistical significance for the *walk*  
 171 community.

172

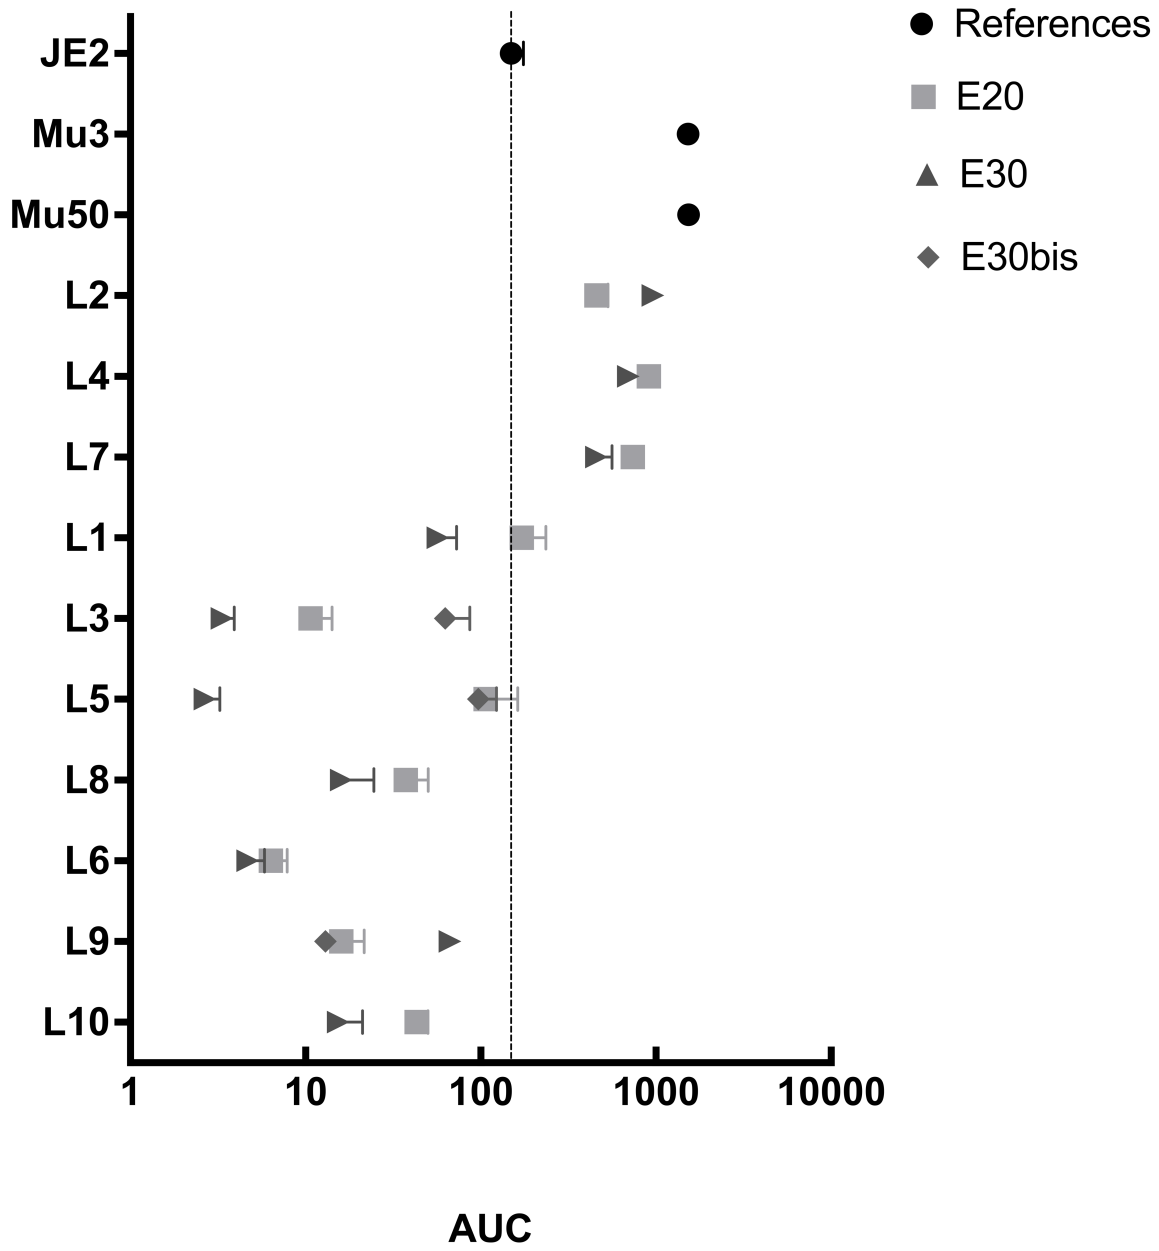

173

174 **Figure S4. Oxacillin susceptibility of JE2-derived VISA strains by PAP-AUC.** Each datapoint

175 shows the mean AUC for 3 to 6 biological replicates. The error bars represent standard

176 deviations.

177

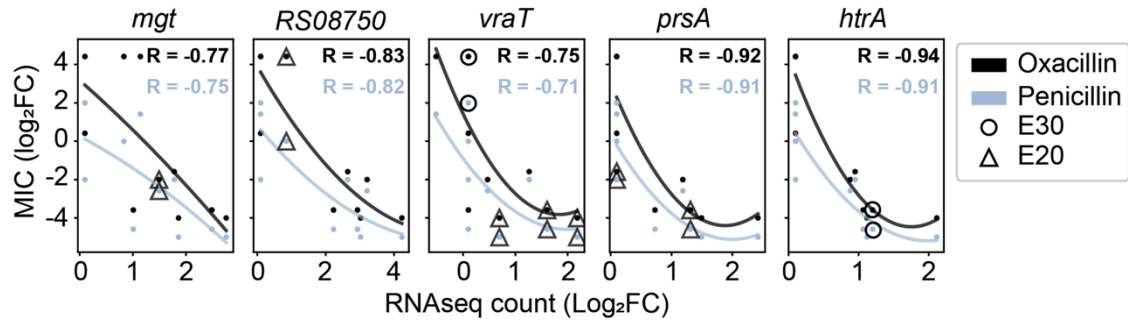

178

179 **Figure S5. Correlation between transcriptional profile of vancomycin-adapted strains and**  
 180 **antibiotic susceptibility.** Correlation between gene expression and antibiotic susceptibility (each  
 181 dot represents a clone, triangles are traced around the dots if the clone is mutated for that gene,  
 182 blue: penicillin, black: oxacillin.

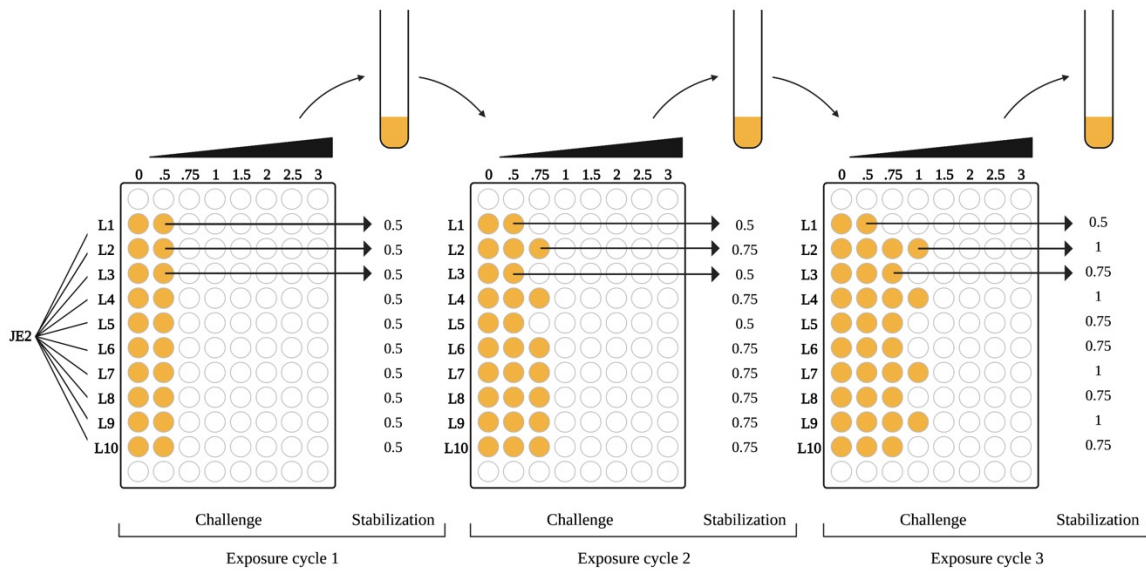

183

184 **Figure S6. Illustration of vancomycin adaptive laboratory evolution.** The MRSA strain JE2 was

185 inoculated in 10 parallel cultures and adapted to vancomycin following a two-step protocol. In the

186 first step, the cultures were challenged with increasing concentrations of vancomycin in 96-well

187 plates. The plates were incubated at 37°C overnight. Aliquots from the highest concentration where

188 growth was observed was used to inoculate tubes containing fresh media and sub-inhibitory

189 concentrations of vancomycin. This second step was used to stabilize any possible adaptation from

190 the vancomycin challenge. The cultures were incubated at 37°C overnight and used to start a new

191 exposure cycle. Yellow coloring represents bacterial growth.

192 **SI Tables:**

193

194 **Table S1. Phenotypic characterization of vancomycin adapted JE2 clones at timepoints E10,**

195 **E20 and E30.** Doubling time expressed in minutes. Vancomycin and oxacillin susceptibility tested

196 using population analysis profile – area under the curve (PAP-AUC).

|                      | Doubling time (min) |     |     |        | PAP-AUC Vancomycin (ratio to Mu3) |      |      |        | PAP-AUC Oxacillin (AUC) |     |     |        |
|----------------------|---------------------|-----|-----|--------|-----------------------------------|------|------|--------|-------------------------|-----|-----|--------|
|                      | E10                 | E20 | E30 | E30bis | E10                               | E20  | E30  | E30bis | E10                     | E20 | E30 | E30bis |
| JE2 (MRSA, ancestor) | 31                  |     |     |        | 0.6                               |      |      |        | 149                     |     |     |        |
| Mu3 (hVISA)          | 34                  |     |     |        | 1                                 |      |      |        | 1528                    |     |     |        |
| Mu50 (VISA)          | 45                  |     |     |        | 3.04                              |      |      |        | 1535                    |     |     |        |
| L1                   | 35                  | 40  | 41  |        | 0.89                              | 1.07 | 1.77 |        | 177                     | 171 | 57  |        |
| L2                   | 39                  | 43  | 46  |        | 1.42                              | 1.86 | 2.45 |        | 559                     | 457 | 962 |        |
| L3                   | 35                  | 38  | 45  | 54     | 1.02                              | 1.19 | 2.15 | 2.42   | 17                      | 11  | 3   | 63     |
| L4                   | 35                  | 47  | 51  |        | 1.41                              | 1.88 | 2.74 |        | 97                      | 910 | 694 |        |
| L5                   | 38                  | 38  | 44  | 41     | 1.00                              | 1.20 | 2.39 | 1.45   | 103                     | 106 | 3   | 97     |
| L6                   | 37                  | 48  | 51  |        | 0.90                              | 1.65 | 1.69 |        | 111                     | 6   | 5   |        |
| L7                   | 32                  | 37  | 40  |        | 0.87                              | 1.22 | 2.04 |        | 263                     | 738 | 457 |        |
| L8                   | 37                  | 44  | 48  |        | 1.20                              | 2.42 | 3.16 |        | 50                      | 37  | 16  |        |
| L9                   | 34                  | 41  | 44  | 47     | 1.22                              | 2.47 | 2.88 | 3.07   | 160                     | 16  | 67  | 13     |
| L10                  | 35                  | 38  | 42  |        | 1.34                              | 1.40 | 2.15 |        | 63                      | 43  | 15  |        |

197

198 **Table S2. Type of mutations from sequencing timepoint E20 and E30 of *in vitro***  
199 **vancomycin evolved strains.** ORF: Open reading frame; SNP: Single nucleotide polymorphism.

|            | Mutations | Intergenic | ORFs | InDels | SNPs | Synonymous | Frameshift | Stop codon |
|------------|-----------|------------|------|--------|------|------------|------------|------------|
| <b>E20</b> | 64        | 9          | 55   | 17     | 47   | 3          | 10         | 4          |
| <b>E30</b> | 109       | 11         | 98   | 25     | 84   | 3          | 13         | 5          |

200

201 **Table S3. Most mutated genes in JE2-derived hVISA and VISA lineages.** Genes/adjacent  
 202 genes/operons mutated in more than one lineage. Bold: mutations in E30 not present in E20;  
 203 underlined: mutations in E20 not present in E30.

| Gene         | Locus            | Lineages mutated |              |           |            |
|--------------|------------------|------------------|--------------|-----------|------------|
| <i>vraT</i>  | SAUSA300_RS10195 | L8               | L9           | L10       | <b>L7</b>  |
| /            | SAUSA300_RS04225 | L1               | L5           | <b>L2</b> | <b>L10</b> |
| <i>graS</i>  | SAUSA300_RS03465 | <b>L1</b>        | <b>L3bis</b> |           |            |
| <i>vraF</i>  | SAUSA300_RS03470 | L9               | <b>L3</b>    | <b>L5</b> | <b>L10</b> |
| <i>vraG</i>  | SAUSA300_RS03475 | <b>L7</b>        |              |           |            |
| <i>pitR</i>  | SAUSA300_RS03480 | L4               |              |           |            |
| <i>pitA</i>  | SAUSA300_RS03485 | L4               | L8           | <b>L3</b> |            |
| <i>ssaA</i>  | SAUSA300_RS12415 | L3               | L5           | L10       |            |
| autolysin    | SAUSA300_RS09395 | L3               | L6           | <b>L9</b> |            |
| <i>walkR</i> | SAUSA300_RS00110 | L4               | L7           | L1        |            |
|              | SAUSA300_RS00105 | L8               |              |           |            |
|              | SAUSA300_RS00115 | L8               |              |           |            |
| <i>rpoB</i>  | SAUSA300_RS02820 | L6               |              |           |            |
| <i>rpoC</i>  | SAUSA300_RS02825 | L2               | L9           |           |            |
| <i>rpoD</i>  | SAUSA300_RS08300 | L2               |              |           |            |
| <i>pdhC</i>  | SAUSA300_RS05360 | L6               | <b>L3</b>    |           |            |
| <i>pdhA</i>  | SAUSA300_RS05350 | L5               |              |           |            |
| <i>pdhD</i>  | SAUSA300_RS05365 | <u>L8</u>        |              |           |            |
| <i>puuR</i>  | SAUSA300_RS05375 | <u>L5</u>        |              |           |            |
| <i>pykA</i>  | SAUSA300_RS08975 | <u>L4</u>        | <u>L7</u>    |           |            |
| <i>apt</i>   | SAUSA300_RS08670 | L1               | L10          |           |            |
| <i>mprF</i>  | SAUSA300_RS06820 | <b>L4</b>        | <b>L8</b>    |           |            |
| <i>rseP</i>  | SAUSA300_RS06255 | L2               | L6           |           |            |
| <i>pbp2</i>  | SAUSA300_RS07315 | <b>L1</b>        | <b>L9</b>    |           |            |
| <i>prsA</i>  | SAUSA300_RS09800 | L3               | L9           |           |            |
| <i>tarF</i>  | SAUSA300_RS01325 | L8               | L9           |           |            |
| <i>murA</i>  | SAUSA300_RS11440 | <b>L7</b>        |              |           |            |
| <i>fbaA</i>  | SAUSA300_RS11445 | <b>L6</b>        |              |           |            |

204

205

206 **Table S4. TCS associated genes mutated in E20 and E30.** We investigated the mutations which  
 207 were classified under cellular processes and signaling. We focused on the set of core *S. aureus*  
 208 two-component systems (15), and collected recently determined regulons for each of eight two-  
 209 component systems.

| <b>Regulator</b> | <b>Locus tag</b> | <b>Name</b>  | <b>E20</b> | <b>E30</b> |
|------------------|------------------|--------------|------------|------------|
| <i>vraRST</i>    | SAUSA300_RS10135 | <i>mgt</i>   | 1          | 2          |
|                  | SAUSA300_RS08750 | /            | 1          | 1          |
|                  | SAUSA300_RS11440 | <i>murA2</i> | 0          | 1          |
|                  | SAUSA300_RS09800 | <i>prsA</i>  | 2          | 4          |
|                  | SAUSA300_RS10195 | <i>vraT</i>  | 4          | 7          |
| <i>saeRS</i>     | SAUSA300_RS12415 | <i>ssaA</i>  | 4          | 7          |
| <i>walKR</i>     | SAUSA300_RS00105 | <i>walR</i>  | 1          | 1          |
|                  | SAUSA300_RS09395 | autolysin    | 2          | 4          |
|                  | SAUSA300_RS05375 | <i>puuR</i>  | 1          | 2          |
|                  | SAUSA300_RS09800 | <i>prsA</i>  | 2          | 4          |
|                  | SAUSA300_RS12415 | <i>ssaA</i>  | 4          | 7          |
|                  | SAUSA300_RS08750 | /            | 1          | 1          |
|                  | SAUSA300_RS00110 | <i>walK</i>  | 3          | 3          |
|                  | SAUSA300_RS10500 | MAP domain   | 0          | 1          |
| <i>graSR</i>     | SAUSA300_RS03475 | <i>vraG</i>  | 0          | 1          |
|                  | SAUSA300_RS00105 | <i>walR</i>  | 1          | 1          |
|                  | SAUSA300_RS06255 | <i>rseP</i>  | 2          | 2          |
|                  | SAUSA300_RS10590 | phiNM3(p)    | 0          | 1          |
|                  | SAUSA300_RS04515 | <i>dltA</i>  | 0          | 1          |
|                  | SAUSA300_RS03470 | <i>vraF</i>  | 1          | 5          |
|                  | SAUSA300_RS02925 | <i>sdrE</i>  | 0          | 1          |
|                  | SAUSA300_RS02625 | <i>ftsH</i>  | 0          | 1          |
|                  | SAUSA300_RS03465 | <i>graS</i>  | 0          | 2          |
|                  | SAUSA300_RS01170 | <i>glpQ</i>  | 0          | 1          |
|                  | SAUSA300_RS06890 | <i>femA</i>  | 1          | 1          |
| <i>nreABC</i>    | SAUSA300_RS03665 | <i>fruR</i>  | 1          | 1          |
| <i>sarA</i>      | SAUSA300_RS03665 | <i>fruR</i>  | 1          | 1          |
| <i>lytSR</i>     | SAUSA300_RS02825 | <i>rpoC</i>  | 2          | 3          |
|                  | SAUSA300_RS02820 | <i>rpoB</i>  | 1          | 1          |
|                  | SAUSA300_RS07105 | <i>odhA</i>  | 0          | 1          |
|                  | SAUSA300_RS06375 | <i>rny</i>   | 1          | 2          |
|                  | SAUSA300_RS05520 | <i>ylbN</i>  | 0          | 1          |
| <i>arlRS</i>     | SAUSA300_RS06375 | <i>rny</i>   | 1          | 2          |
|                  | SAUSA300_RS12570 | /            | 0          | 1          |
|                  | SAUSA300_RS11315 | <i>murA2</i> | 0          | 1          |

210

211



212 **Table S5. Communities extracted from two co-occurrence graphs constructed at E20 and**  
 213 **E30.** Genes included are targeted by a mutation in at least one clone.

|                       | <b>E20</b>                                                                                                                                                                 | <b>E30</b>                                                                                                                                                                                                                                                                                                           |
|-----------------------|----------------------------------------------------------------------------------------------------------------------------------------------------------------------------|----------------------------------------------------------------------------------------------------------------------------------------------------------------------------------------------------------------------------------------------------------------------------------------------------------------------|
| <i>Walk community</i> | <i>pdhD, walk, pitR, pitA, SAUSA300_RS13540, SAUSA300_RS10925, walR, glpP, vraT, SMSAP5(p1), SAUSA300_RS06395, SAUSA300_RS09680, stp1, fruR, rsbW, dnaQ, pykA</i>          | <i>pitA, TarF_1, walR, glpP, SMSAP5(p1), PepSY domain p1, SAUSA300_RS09680, dnaQ, vraG, vraT, stp1, fruR, walk, tcaR, SAUSA300_RS10925, ebh, SAUSA300_RS06395, pykA, pdhD, SAUSA300_RS13540, yqfL, mprF, murA2, pitR, rsbW</i>                                                                                       |
| <i>VraF community</i> | <i>vraF, rny, puuR, SAUSA300_RS04225, rpoC, gdpP, ysdC, relA, apt, prsA, ssaA, sgtB, SAUSA300_RS11565, sagB, SAUSA300_RS08750, pdhC, rpoD, pdhA, rpoB, mfd, rseP, femA</i> | <i>SAUSA300_RS03100, vraF, rny, puuR, rihA, SAUSA300_RS04225, ylbN, SAUSA300_RS05040, rpoC, gdpP, SAUSA300_RS08675, fbaA, ysdC, relA, apt, prsA, SAUSA300_RS08095, graS, ssaA, odhA, sgtB, sdrE, pbp2, sagB, SAUSA300_RS11565, T2SS, SAUSA300_RS08750, rpoD, pdhC, rlmH, pdhA, rpoB, mfd, rseP, femA, TsaD, dltA</i> |
| <i>Walk community</i> | L1_E20, L10_E20, L4_E20, L9_E20, L7_E20, L8_E20                                                                                                                            | L9_E30bis, L7_E30, L3_E30, L8_E30, L10_E30, L4_E30, L1_E30                                                                                                                                                                                                                                                           |
| <i>VraF community</i> | L2_E20, L3_E20, L1_E20, L10_E20, L6_E20, L9_E20, L5_E20                                                                                                                    | L9_E30bis, L2_E30, L6_E30, L3_E30, L5_E30, L5_E30bis, L10_E30, L3_E30bis, L1_E30                                                                                                                                                                                                                                     |

214

215

216 **Table S6. Effect of vancomycin-adaptive *vraT* and *walk* mutations on vancomycin and**  
 217 **oxacillin susceptibility.** Mutations in *vraT* and *walk* were amplified from JE2-derived VISA  
 218 isolates (L7\_E30, L8\_E20, L10\_E20, L1\_E20 and L7\_E20) and inserted into the chromosome of  
 219 WT strain JE2. Vancomycin and oxacillin MIC was determined using Etests.

|                                    | Vancomycin MIC (mg/L) | Oxacillin MIC (mg/L) |
|------------------------------------|-----------------------|----------------------|
| JE2                                | 0.75                  | 16                   |
| JE2 <i>vraT</i> <sub>L7_E30</sub>  | 1                     | 256                  |
| JE2 <i>vraT</i> <sub>L8_E20</sub>  | 1.5                   | 256                  |
| JE2 <i>vraT</i> <sub>L10_E20</sub> | 1                     | 256                  |
| JE2 <i>walk</i> <sub>L1_E20</sub>  | 1                     | 1                    |
| JE2 <i>walk</i> <sub>L7_E20</sub>  | 1                     | 1.5                  |

220

221 **Table S7. Overexpression of selected genes in MRSA strain JE2.** Genes were cloned in  
 222 plasmid pSK9067 (3) behind the IPTG-inducible promoter P<sub>spac</sub>. Vancomycin and oxacillin MIC was  
 223 determined using Etests in presence or absence of IPTG.

|                   | Vancomycin MIC |            | Oxacillin MIC |            |
|-------------------|----------------|------------|---------------|------------|
|                   | no IPTG        | IPTG 800µM | no IPTG       | IPTG 800µM |
| JE2pgfp (control) | 0.75           | 0.75       | 16            | 16         |
| JE2pvraX          | 0.75           | 0.75       | 12            | 16         |
| JE2pcwra          | 0.75           | 0.75       | 16            | 16         |
| JE2pRS02980       | 0.75           | 0.75       | 16            | 24         |
| JE2pRS08750       | 0.75           | 0.75       | 16            | 12         |
| JE2psceD          | 0.75           | 0.75       | 16            | 16         |
| JE2pvraR          | 0.75           | 0.75       | 16            | 64         |
| JE2pvraS          | 0.75           | 0.75       | 12            | 16         |
| JE2pvraT          | 0.75           | 0.75       | 12            | 12         |
| JE2pvraU          | 0.75           | 0.75       | 12            | 12         |

224

225

226 **Table S8. Strains used in the study. (16–20)**

| Bacterial strains                   | Description                                                                                                                  | Source                                |
|-------------------------------------|------------------------------------------------------------------------------------------------------------------------------|---------------------------------------|
| <i>S. aureus</i> laboratory strains |                                                                                                                              |                                       |
| JE2                                 | Plasmid-cured derivative of MRSA strain USA300 LAC                                                                           | 16                                    |
| L1, L2, L3,..., L10                 | Vancomycin-adapted lineages independently evolved from JE2                                                                   | This study                            |
| L1_E10 to L10_E10                   | Vancomycin-adapted JE2 clones from 10 rounds of <i>in vitro</i> passaging                                                    | This study                            |
| L1_E20 to L10_E20                   | Vancomycin-adapted JE2 clone from 20 rounds of <i>in vitro</i> passaging                                                     | Derived from E10 clones<br>This study |
| L1_E30 to L10_E30                   | Vancomycin-adapted JE2 clone from 30 rounds of <i>in vitro</i> passaging                                                     | Derived from E20 clones<br>This study |
| N315.1 to N315.5                    | Vancomycin-adapted N315 clone from 20 rounds of <i>in vitro</i> passaging                                                    | This study                            |
| 110822.1 to 110822.5                | Vancomycin-adapted 110822 clone from 20 rounds of <i>in vitro</i> passaging                                                  | This study                            |
| 109384.1 to 109384.5                | Vancomycin-adapted 109384 clone from 20 rounds of <i>in vitro</i> passaging                                                  | This study                            |
| 109652.1 to 109652.5                | Vancomycin-adapted 109652 clone from 20 rounds of <i>in vitro</i> passaging                                                  | This study                            |
| 110788.1 to 110788.5                | Vancomycin-adapted 110788 clone from 20 rounds of <i>in vitro</i> passaging                                                  | This study                            |
| 19902.1 to 19902.5                  | Vancomycin-adapted 19902 clone from 20 rounds of <i>in vitro</i> passaging                                                   | This study                            |
| JE2 <i>vraT</i> <sub>L7_E30</sub>   | JE2 with <i>vraT</i> mutation Thr8Met from L7_E30                                                                            | This study                            |
| JE2 <i>vraT</i> <sub>L8_E20</sub>   | JE2 with <i>vraT</i> mutation Ser7Leu from L8_E20                                                                            | This study                            |
| JE2 <i>vraT</i> <sub>L10_E20</sub>  | JE2 with <i>vraT</i> mutation Glu375_Ala377del from L10_E20                                                                  | This study                            |
| JE2 <i>walkK</i> <sub>L1_E20</sub>  | JE2 with <i>walkK</i> mutation Asn335_E336insAspSerPheLeuLeuAspLeuAsn from L1_E20                                            | This study                            |
| JE2 <i>walkK</i> <sub>L7_E20</sub>  | JE2 with <i>walkK</i> mutation Ser273Asn from L7_E20                                                                         | This study                            |
| JE2 <i>pgfp</i>                     | JE2 pSK9067_ <i>gfp</i> - original plasmid carrying the <i>gfp</i> gene behind IPTG-inducible Pspac promoter                 | This study                            |
| JE2 <i>pvraX</i>                    | JE2 pSK9067_ <i>vraX</i> - plasmid obtained by cloning the <i>vraX</i> gene behind IPTG-inducible P <sub>spac</sub> promoter | This study                            |
| JE2pRS02980                         | JE2 pSK9067_RS02980 - plasmid obtained by cloning SAUSA300_RS02980 behind IPTG-inducible Pspac promoter                      | This study                            |
| JE2pRS08750                         | JE2 pSK9067_RS08750 - plasmid obtained by cloning SAUSA300_RS08750 behind IPTG-inducible Pspac promoter                      | This study                            |
| JE2 <i>psceD</i>                    | JE2 pSK9067_ <i>sceD</i> - plasmid obtained by cloning the <i>sceD</i> gene behind IPTG-inducible Pspac promoter             | This study                            |
| JE2 <i>pvraR</i>                    | JE2 pSK9067_ <i>vraR</i> - plasmid obtained by cloning the <i>vraR</i> gene behind IPTG-inducible Pspac promoter             | This study                            |
| JE2 <i>pvraS</i>                    | JE2 pSK9067_ <i>vraS</i> - plasmid obtained by cloning the <i>vraS</i> gene behind IPTG-inducible Pspac promoter             | This study                            |
| JE2 <i>pvraT</i>                    | JE2 pSK9067_ <i>vraT</i> - plasmid obtained by cloning the <i>vraT</i> gene behind IPTG-inducible Pspac promoter             | This study                            |
| JE2 <i>pvraU</i>                    | JE2 pSK9067_ <i>vraU</i> - plasmid obtained by cloning the <i>vraU</i> gene behind IPTG-inducible Pspac promoter             | This study                            |
| <i>S. aureus</i> clinical isolates  |                                                                                                                              |                                       |
| Mu50                                | VISA clinical isolate from Japanese hospital in 1996                                                                         | 17                                    |
| Mu3                                 | hVISA clinical isolate from Japanese hospital in 1996                                                                        | 18                                    |
| N315                                | MRSA clinical isolate from Japanese hospital in 1982                                                                         | 19                                    |
| 110822                              | Clinical isolate                                                                                                             | 20                                    |
| 109384                              | Clinical isolate                                                                                                             | 20                                    |
| 109652                              | Clinical isolate                                                                                                             | 20                                    |
| 110788                              | Clinical isolate                                                                                                             | 20                                    |

228 **Table S9. Assessment of population heterogeneity by sequencing L9 mixed population at**  
 229 **E20 and single clone L9\_E20.** An aliquot sampled from population L9 at E20 during serial  
 230 passaging, and a single clone isolated from this population, were used for genome sequencing.

|                      | Region           | Gene        | Locus tag        | Old locus tag | Type     | Reference | Allele | Length | Coverage | Frequency | Average quality | AA change |                   |
|----------------------|------------------|-------------|------------------|---------------|----------|-----------|--------|--------|----------|-----------|-----------------|-----------|-------------------|
| L9_E20 single colony | 592140           | <i>rpoC</i> | SAUSA300_RS02825 | SAUSA300_0528 | SNV      | C         | T      | 1      | 383      | 99        | 33              | Arg958Cys |                   |
|                      | 610942           | /           | /                | /             | SNV      | G         | A      | 1      | 18       | 100       | 30              |           |                   |
|                      | 721032           | <i>vraF</i> | SAUSA300_RS03470 | SAUSA300_0647 | SNV      | C         | T      | 1      | 89       | 99        | 34              | Ser55Leu  |                   |
|                      | 1131799          | /           | /                | /             | SNV      | T         | C      | 1      | 75       | 100       | 33              |           |                   |
|                      | 1959544          | /           | /                | /             | SNV      | G         | T      | 1      | 67       | 100       | 33              |           |                   |
|                      | 2027481          | <i>vraT</i> | SAUSA300_RS10195 | SAUSA300_1867 | SNV      | T         | C      | 1      | 127      | 99        | 34              | Glu156Gly |                   |
|                      | 2027645          | <i>vraT</i> | SAUSA300_RS10195 | SAUSA300_1867 | Deletion | T         | -      | 1      | 131      | 94        | 33              | Val102fs  |                   |
|                      | 2586148          | /           | SAUSA300_RS13290 | SAUSA300_2400 | SNV      | C         | T      | 1      | 195      | 100       | 34              |           |                   |
|                      | 1972154..1972225 | <i>prsA</i> | SAUSA300_RS09800 | SAUSA300_1790 | Deletion |           |        | 72     |          |           |                 |           | Leu204_Glu227del  |
|                      | 1740991          | <i>relA</i> | SAUSA300_RS08665 | SAUSA300_1590 | SNV      | G         | A      | 1      | 128      | 100       | 34              |           | <i>Synonymous</i> |
| L9_E20 population    | 592140           | <i>rpoC</i> | SAUSA300_RS02825 | SAUSA300_0528 | SNV      | C         | T      | 1      | 345      | 99        | 32              | Arg958Cys |                   |
|                      | 610942           | /           | /                | /             | SNV      | G         | A      | 1      | 24       | 100       | 36              |           |                   |
|                      | 721032           | <i>vraF</i> | SAUSA300_RS03470 | SAUSA300_0647 | SNV      | C         | T      | 1      | 80       | 100       | 33              | Ser55Leu  |                   |
|                      | 1131799          | /           | /                | /             | SNV      | T         | C      | 1      | 72       | 99        | 32              |           |                   |
|                      | 1959544          | /           | /                | /             | SNV      | G         | T      | 1      | 70       | 100       | 32              |           |                   |
|                      | 2027481          | <i>vraT</i> | SAUSA300_RS10195 | SAUSA300_1867 | SNV      | T         | C      | 1      | 134      | 100       | 34              | Glu156Gly |                   |
|                      | 2027645          | <i>vraT</i> | SAUSA300_RS10195 | SAUSA300_1867 | Deletion | T         | -      | 1      | 138      | 96        | 34              | Val102fs  |                   |
|                      | 2586148          | /           | SAUSA300_RS13290 | SAUSA300_2400 | SNV      | C         | T      | 1      | 182      | 99        | 32              |           |                   |
|                      | 1972154..1972225 | <i>prsA</i> | SAUSA300_RS09800 | SAUSA300_1790 | Deletion |           |        | 72     |          |           |                 |           | Leu204_Glu227del  |

231

232

233 **Table S10. Oligonucleotides used in the study.**

| Name              | Sequence 5'-3'                                        |
|-------------------|-------------------------------------------------------|
| vraX-FW_Sall      | GATACAGTCGACGCAAAGGAGGTAATATAGGTTATG                  |
| vraX-RV_EcoRI     | GATACAGAATTC TTA ACTA AACTTTTCATATGATCTATATCGTC       |
| cwrA-FW_Sall      | GATACAGTCGACATATAAAGGAGTATGATAGCGATGAG                |
| cwrA-RV_EcoRI     | GATACAGAATTC TTA AAA GAAATCAGATGGGTAAATTC             |
| RS02980-FW_Sall   | GATACAGTCGACAATGTTAGGATGTAATATGTCTTAGAG               |
| RS02980-RV_EcoRI  | GATACAGAATTC TCA ATATCCCTCAC TCAATGTAAAC              |
| RS08750-FW_Sall   | GATACAGTCGACCATTGGAGGCGAACTATGAG                      |
| RS08750-RV_EcoRI  | GATACAGAATTCCTATTGATAAGCATTTTCAGATTTTAGTT             |
| sceD-F_Sall       | GATACAGTCGACGAGAAACAAATTA CTGTAGGAG                   |
| sceD-R_EcoRI      | GATACAGAATTC TTATGCAGTAACCCAAATGTCC                   |
| vraR-FW_Sall      | GATACAGTCGACAATAAGGAGGATTCGTATGACG                    |
| vraR-RV_EcoRI     | GATACAGAATTCCTATTGAATTAATTTATGTTGGAATGC               |
| vraS-FW_Sall      | GATACAGTCGACTATCGGAGACGTAGAGGTG                       |
| vraS-RV_EcoRI     | GATACAGAATTC TTA ATCGTCATACGAATCCTC                   |
| vraT-FW_Sall      | GATACAGTCGACATAGAAAGGCGGCGAAAC                        |
| vraT-RV_EcoRI     | GATACAGAATTC CATCGATAAATCACCTCTACG                    |
| vraU-FW_Sall      | GATACAGTCGACTAAAAGGTGATAGTTATGAACTATGTTG              |
| vraU-RV_EcoRI     | GATACAGAATTCCTATGCCACAGCGTTCA                         |
| pSK9067_FW        | ATGAACCAAGACAGCATCG                                   |
| pSK9067_RV        | ATGCGTAAGGAGAAAATACCG                                 |
| walK_L1_L7_FW     | CCTCACTAAAGGGAACAAAAGCTGGGTACCATGAAGTGGCTAAAACAAC TAC |
| walK_L1_L7_RV     | CGACTCACTATAGGGCGAATTGGAGCTCTTATTCATCCCAATCACCGTC     |
| vraT_L7_L8_FW     | CCTCACTAAAGGGAACAAAAGCTGGGTACCTGTTGCTCAAATTGAGCATA C  |
| vraT_L7_L8_L10_RV | CGACTCACTATAGGGCGAATTGGAGCTCTCATCGATAAATCACCTCTACG    |
| vraT_L10_FW       | CCTCACTAAAGGGAACAAAAGCTGGGTACCGCACTACCTTTTAATGCTAGATG |

234

235

236 **SI Datasets:**

237

238 **Dataset S1. Mutations from sequencing timepoint E20 and E30 of *in vitro* vancomycin**  
239 **evolved strains.** Mutations highlighted in blue were present in E20 and conserved in E30.  
240 Mutations highlighted in yellow were present in E20 and lost in E30. Mutations not highlighted are  
241 mutations acquired between E20 and E30. (Excel file)

242 **Dataset S2. Feature table for the iModulon structure extracted from the transcriptomic data**  
243 **using independent component analysis. ICA yields an activity matrix, which represents the**  
244 **activity level of each independent component in each strain, and a weight matrix which**  
245 **contains the weight of each gene across each independent component.** (Excel file)

246 **Dataset S3. Expression in E20 strains for selected cell wall and VISA genes.** (Excel file)

247 **Dataset S4. Spearman correlation between gene expression levels and antibiotic MIC. Gene**  
248 **expression-antibiotic links are filtered for Spearman  $R > 0.7$ .** (Excel file)

249 **SI References**

- 250 1. M. Rodriguez de Evgrafov, H. Gumpert, C. Munck, T. T. Thomsen, M. O. A. Sommer,  
251 Collateral Resistance and Sensitivity Modulate Evolution of High-Level Resistance to Drug  
252 Combination Treatment in *Staphylococcus aureus*. *Molecular Biology and Evolution* **32**,  
253 1175–1185 (2015).
- 254 2. I. R. Monk, J. J. Tree, B. P. Howden, T. P. Stinear, T. J. Foster, Complete Bypass of  
255 Restriction Systems for Major *Staphylococcus aureus* Lineages. *mBio* **6**, e00308-15.
- 256 3. A. J. Brzoska, N. Firth, Two-Plasmid Vector System for Independently Controlled  
257 Expression of Green and Red Fluorescent Fusion Proteins in *Staphylococcus aureus*. *Appl.*  
258 *Environ. Microbiol.* **79**, 3133–3136 (2013).
- 259 4. I. R. Monk, T. P. Y. 2021 Stinear, From cloning to mutant in 5 days: rapid allelic exchange in  
260 *Staphylococcus aureus*. *Access Microbiology* **3**, 000193.
- 261 5. F. Radicchi, C. Castellano, F. Cecconi, V. Loreto, D. Parisi, Defining and identifying  
262 communities in networks. *PNAS* **101**, 2658–2663 (2004).
- 263 6. A. V. Sastry, *et al.*, The *Escherichia coli* transcriptome mostly consists of independently  
264 regulated modules. *Nat Commun* **10**, 5536 (2019).
- 265 7. S. Poudel, *et al.*, Revealing 29 sets of independently modulated genes in *Staphylococcus*  
266 *aureus*, their regulators, and role in key physiological response. *Proc Natl Acad Sci U S A*  
267 **117**, 17228–17239 (2020).
- 268 8. R. B. D'Agostino, A. Belanger, A Suggestion for Using Powerful and Informative Tests of  
269 Normality. *The American Statistician* **44**, 316–321 (1990).
- 270 9. F. Pedregosa, *et al.*, Scikit-learn: Machine Learning in Python. *J. Mach. Learn. Res.* **12**,  
271 2825–2830 (2011).
- 272 10. S. Boyle-Vavra, S. Yin, D. S. Jo, C. P. Montgomery, R. S. Daum, *VraT/YvqF* Is Required for  
273 Methicillin Resistance and Activation of the *VraSR* Regulon in *Staphylococcus aureus*.  
274 *Antimicrob Agents Chemother* **57**, 83–95 (2013).
- 275 11. A. Delauné, *et al.*, The WalkR System Controls Major Staphylococcal Virulence Genes and  
276 Is Involved in Triggering the Host Inflammatory Response. *Infect Immun* **80**, 3438–3453  
277 (2012).
- 278 12. D. A. Ravcheev, *et al.*, Inference of the transcriptional regulatory network in *Staphylococcus*  
279 *aureus* by integration of experimental and genomics-based evidence. *J Bacteriol* **193**,  
280 3228–3240 (2011).
- 281 13. M. Kuroda, *et al.*, Two-component system *VraSR* positively modulates the regulation of cell-  
282 wall biosynthesis pathway in *Staphylococcus aureus*. *Molecular Microbiology* **49**, 807–821  
283 (2003).
- 284 14. M. Falord, U. Mäder, A. Hiron, M. Débarbouillé, T. Msadek, Investigation of the  
285 *Staphylococcus aureus* GraSR Regulon Reveals Novel Links to Virulence, Stress  
286 Response and Cell Wall Signal Transduction Pathways. *PLoS One* **6** (2011).
- 287 15. A. Rajput, *et al.*, Pangenome Analytics Reveal Two-Component Systems as Conserved  
288 Targets in ESKAPEE Pathogens. *mSystems* **6** (2021).



- 289 16. P. D. Fey, *et al.*, A Genetic Resource for Rapid and Comprehensive Phenotype Screening  
290 of Nonessential *Staphylococcus aureus* Genes. *mBio* **4**, e00537-12 (2013).
- 291 17. K. Hiramatsu, *et al.*, Methicillin-resistant *Staphylococcus aureus* clinical strain with reduced  
292 vancomycin susceptibility. *J Antimicrob Chemother* **40**, 135–136 (1997).
- 293 18. K. Hiramatsu, *et al.*, Dissemination in Japanese hospitals of strains of *Staphylococcus*  
294 *aureus* heterogeneously resistant to vancomycin. *The Lancet* **350**, 1670–1673 (1997).
- 295 19. K. Okonogi, Y. Noji, M. Kondo, A. Imada, T. Yokota, Emergence of methicillin-resistant  
296 clones from cephamycin-resistant *Staphylococcus aureus*. *J Antimicrob Chemother* **24**,  
297 637–645 (1989).
- 298 20. K. Mikkelsen, “Intrinsic resistance mechanisms and CRISPR-Cas immunity of the  
299 opportunistic pathogen, *Staphylococcus aureus*.” PhD thesis (2021).
- 300
